# Supplementary material
Source: PubMed Central journal article supplement (PMC3284320)
Supplement: supp_215.6.986_JEB058602SuppTable1.pdf [file supp_215.6.986_JEB058602SuppTable1.pdf]

Table S1. Software summary

| Software                 | Primary analysis functions used                                                                                                                                  | Software version |
|--------------------------|------------------------------------------------------------------------------------------------------------------------------------------------------------------|------------------|
| R                        |                                                                                                                                                                  | 1.12.1, 64-bit   |
| MASS (R package)         | <i>lda</i> (linear discriminant analysis)                                                                                                                        | 7.3-9            |
| e1071 (R package)        | <i>tune.svm</i> , <i>tune.rpart</i> , <i>tune.randomForest</i> ,<br><i>tune.nnet</i> (cross-validated parameter tuning),<br><i>svm</i> (support vector machines) | 1.5-24           |
| rpart (R package)        | <i>rpart</i> (classification and regression trees)                                                                                                               | 3.1-48           |
| randomForest (R package) | <i>randomForest</i> (random forests)                                                                                                                             | 4.6-2            |
| caret (R package)        | <i>pcaNNet</i> (ANN with principal component<br>analysis, uses <i>nnet</i> package to build ANN)                                                                 | 4.73             |
