# Supplementary material
Source: PubMed Central journal article supplement (PMC3284320)

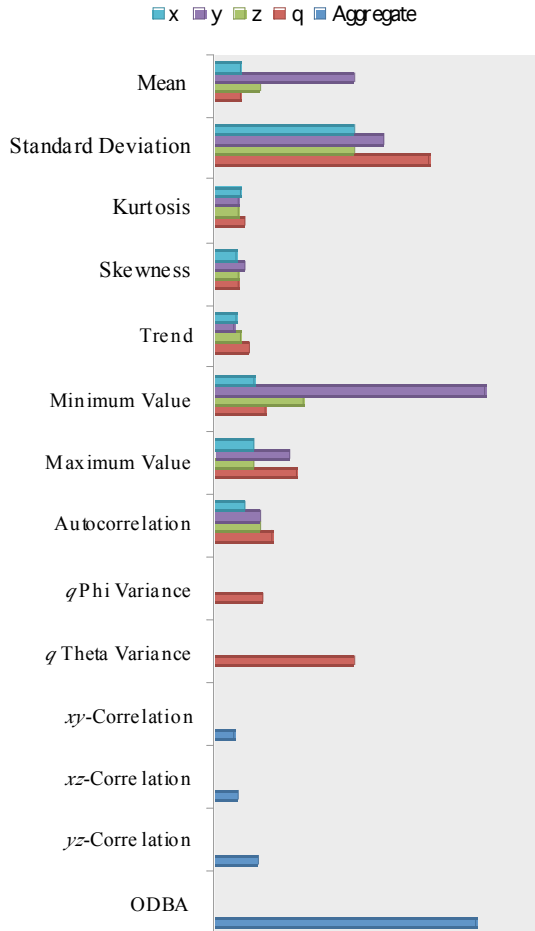

Supplement: supp_215.6.986_JEB058602FigS1.pdf [file supp_215.6.986_JEB058602FigS1.pdf]
